# Supplementary material for: Identification of 24 Unknown Substances (NIAS/IAS) from Food Contact Polycarbonate by LC-Orbitrap Tribrid HRMS-DDMS3: Safety Assessment
Source: Hindawi journal article supplement (doi:10.1155/2021/6654611), 2021-03-26
Supplement: f1 [file 6654611.f1.pdf]

## SUPPORTING INFORMATION

### Identification of 24 unknown substances (NIAS/IAS) from food contact polycarbonate by LC-Orbitrap Tribrid HRMS-DDMS<sup>3</sup>. Safety assessment

Vicent Yusà<sup>a,b\*</sup>, Antonio López<sup>a</sup>, Pablo Dualde<sup>a</sup>, Olga Pardo<sup>a</sup>, Igor Fochi<sup>c</sup>, Clara Coscolla<sup>a</sup>

*a* Foundation for the Promotion of Health and Biomedical Research in the Valencian Region, FISABIO-Public Health, Av. Catalunya, 21, 46020 Valencia, Spain

*b* Public Health Laboratory of Valencia, 21, Avenida Cataluña, 46020 Valencia, Spain

*c* Thermo Fisher, Rodano (MI), Italy

\*Corresponding author.

E-mail address: yusa\_vic@gva.es (V. Yusà).

| <b>Figures</b>                                                                         | <b>Page</b> |
|----------------------------------------------------------------------------------------|-------------|
| <b>Figure SI-1.</b> Workflow for the ddMS <sup>3</sup> used in AcquireX Deep Scan Mode | <b>2</b>    |
| <b>Figure SI-2:</b> Workflow for the ddMS <sup>3</sup> used in AcquireX IPE Mode       | <b>5</b>    |
| <b>Figure SI-3:</b> Compound Discover Workflow                                         | <b>8</b>    |
| <b>Figure SI-4.</b> Log P and Retention Time (Rt) of the quality control compounds     | <b>9</b>    |
| <b>Tables</b>                                                                          |             |
| <b>Table SI-1.</b> Description of the different nodes of the CD workflow               | <b>12</b>   |
| <b>Table SI-2.</b> Calculation of the average response factor                          | <b>23</b>   |
| <b>Table SI-3.</b> Experimental MS3 transitions                                        | <b>24</b>   |

**Figure SI-1: Workflow for the ddMS<sup>3</sup> used in AcquireX Deep Scan Mode**

The figure illustrates the workflow and configuration for ddMS<sup>3</sup> in AcquireX Deep Scan Mode. It is divided into three horizontal sections, each showing a workflow diagram on the left and a configuration panel on the right.

**Workflow Diagrams:** Each diagram shows a vertical sequence of steps: MS OT (0.6 sec), Dynamic Exclusion, Targeted Mass Exclusion, Targeted Mass, ddMS<sup>2</sup> OT HCD (2 scans), Precursor Selection Range, Intensity, Precursor Ion Exclusion, and ddMS<sup>3</sup> IT CID. The top diagram has 'MS OT' highlighted with a blue border and a close button. The middle diagram has 'Dynamic Exclusion' highlighted. The bottom diagram has 'Targeted Mass Exclusion' highlighted.

**MS Scan Properties:**

- Orbitrap Resolution: 120000
- Scan Range (m/z): 100-900
- RF Lens (%): 45
- Maximum Injection Time (ms): 50
- Polarity: Positive
- Use EASY-IC™:

**Dynamic Exclusion Properties:**

- Use Common Settings:
- Exclude after n times: 1
- Exclusion duration (s): 2.5
- Mass Tolerance: ppm
- Low: 5
- High: 5
- Exclude Isotopes:

**Targeted Mass Exclusion Properties:**

MASS LIST

- Include Start/End Times:
- Include Intensity Threshold:
- Add Mass List Targets Determined by Xcalibur AcquireX:
- Mass List Type: m/z

| Compound | m/z     | t start (min) | t stop (min) | Inten  |
|----------|---------|---------------|--------------|--------|
| 1        | 524.265 | 0             | 15           | 1.0e20 |

Exclusion mass width: ppm

- Low: 5
- High: 5

**Data-Dependent MS<sup>n</sup> Scan Properties** [Show All](#)

|                             |                                     |
|-----------------------------|-------------------------------------|
| Isolation Window (m/z)      | 1.5                                 |
| Isolation Offset            | Off                                 |
| Activation Type             | HCD                                 |
| Collision Energy Mode       | Stepped                             |
| HCD Collision Energies (%)  | 20,40,90                            |
| Detector Type               | Orbitrap                            |
| Orbitrap Resolution         | 15000                               |
| Maximum Injection Time (ms) | 22                                  |
| Use EASY-IC™                | <input checked="" type="checkbox"/> |

**Precursor Selection Range Properties**

|                      |            |
|----------------------|------------|
| Selection Range Mode | Mass Range |
| Mass Range (m/z)     | 125-2000   |

**Intensity Properties**

|                     |                     |
|---------------------|---------------------|
| Filter Type         | Intensity Threshold |
| Intensity Threshold | 5.0e3               |

```

graph TD
    A[MS OT] --> B[Dynamic Exclusion]
    B --> C[Targeted Mass Exclusion]
    C --> D[Targeted Mass]
    D --> E[ddMS² OT HCD]
    E --> F[Precursor Selection Range]
    F --> G[Intensity]
    G --> H[Precursor Ion Exclusion]
    H --> I[ddMS³ IT CID]
    
```

#### Precursor Ion Exclusion Properties

|                      |     |
|----------------------|-----|
| Exclusion mass width | m/z |
| Low                  | 0.5 |
| High                 | 3   |

---

```

graph TD
    A[MS OT] --> B[Dynamic Exclusion]
    B --> C[Targeted Mass Exclusion]
    C --> D[Targeted Mass]
    D --> E[ddMS² OT HCD]
    E --> F[Precursor Selection Range]
    F --> G[Intensity]
    G --> H[Precursor Ion Exclusion]
    H --> I[ddMS³ IT CID]
    
```

#### Data-Dependent MS<sup>n</sup> Scan Properties Show All

|                             |          |
|-----------------------------|----------|
| MS <sup>n</sup> Level       | 3        |
| MS Isolation Window (m/z)   | 1.8      |
| MS2 Isolation Window (m/z)  | 2        |
| Isolation Offset            | Off      |
| Activation Type             | CID      |
| CID Collision Energy (%)    | 30       |
| Detector Type               | Ion Trap |
| Ion Trap Scan Rate          | Rapid    |
| Maximum Injection Time (ms) | 35       |

**Figure SI-2: Workflow for the ddMS<sup>3</sup> used in AcquireX IPE Mode**

The figure illustrates the ddMS<sup>3</sup> workflow in AcquireX IPE Mode, divided into three panels. Each panel shows a sequence of steps in a flowchart and a corresponding configuration window.

**Panel 1: Intensity Properties**

The flowchart shows the following steps: MS OT, Intensity (0.6 sec), Dynamic Exclusion, Targeted Mass Exclusion, ddMS<sup>2</sup> OT HCD, Precursor Selection Range, Intensity (2 scans), Precursor Ion Exclusion, and ddMS<sup>3</sup> IT CID.

The Intensity Properties window shows:

- Filter Type: Intensity Threshold
- Intensity Threshold: 4.0e4

**Panel 2: Dynamic Exclusion Properties**

The flowchart shows the following steps: MS OT, Intensity (0.6 sec), Dynamic Exclusion, Targeted Mass Exclusion, ddMS<sup>2</sup> OT HCD, Precursor Selection Range, Intensity (2 scans), Precursor Ion Exclusion, and ddMS<sup>3</sup> IT CID.

The Dynamic Exclusion Properties window shows:

- Use Common Settings:
- Exclude after n times: 1
- Exclusion duration (s): 2.5
- Mass Tolerance: ppm
- Low: 5
- High: 5
- Exclude Isotopes:

**Panel 3: Targeted Mass Exclusion Properties**

The flowchart shows the following steps: MS OT, Intensity (0.6 sec), Dynamic Exclusion, Targeted Mass Exclusion, ddMS<sup>2</sup> OT HCD, Precursor Selection Range, Intensity (2 scans), Precursor Ion Exclusion, and ddMS<sup>3</sup> IT CID.

The Targeted Mass Exclusion Properties window shows:

- Include Start/End Times:
- Include Intensity Threshold:
- Add Mass List Targets Determined by Xcalibur AcquireX:
- Mass List Type: m/z

**MASS LIST**

| Compound | m/z     | t start (min) | t stop (min) | Inten  |
|----------|---------|---------------|--------------|--------|
| 1        | 524.265 | 0             | 15           | 1.0e20 |

Exclusion mass width: ppm

- Low: 5
- High: 5

**Data-Dependent MS<sup>n</sup> Scan Properties** [Show All](#)

|                             |                                     |
|-----------------------------|-------------------------------------|
| Isolation Window (m/z)      | 1.5                                 |
| Isolation Offset            | Off                                 |
| Activation Type             | HCD                                 |
| Collision Energy Mode       | Stepped                             |
| HCD Collision Energies (%)  | 20,40,90                            |
| Detector Type               | Orbitrap                            |
| Orbitrap Resolution         | 15000                               |
| Maximum Injection Time (ms) | 22                                  |
| Use EASY-IC™                | <input checked="" type="checkbox"/> |

**Precursor Selection Range Properties**

|                      |            |
|----------------------|------------|
| Selection Range Mode | Mass Range |
| Mass Range (m/z)     | 125-2000   |

**Intensity Properties**

|                     |                     |
|---------------------|---------------------|
| Filter Type         | Intensity Threshold |
| Intensity Threshold | 5.0e3               |

```

graph TD
    A[MS OT] --> B[Intensity]
    B --> C[Dynamic Exclusion]
    C --> D[Targeted Mass Exclusion]
    D --> E[ddMS² OT HCD]
    E --> F[Precursor Selection Range]
    F --> G[Intensity]
    G --> H[Precursor Ion Exclusion]
    H --> I[ddMS³ IT CID]
    
```

0.6 sec

2 scans

#### Precursor Ion Exclusion Properties

|                      |     |
|----------------------|-----|
| Exclusion mass width | m/z |
| Low                  | 0.5 |
| High                 | 3   |

---

```

graph TD
    A[MS OT] --> B[Intensity]
    B --> C[Dynamic Exclusion]
    C --> D[Targeted Mass Exclusion]
    D --> E[ddMS² OT HCD]
    E --> F[Precursor Selection Range]
    F --> G[Intensity]
    G --> H[Precursor Ion Exclusion]
    H --> I[ddMS³ IT CID]
    
```

0.6 sec

2 scans

#### Data-Dependent MS<sup>n</sup> Scan Properties Show All

|                             |          |
|-----------------------------|----------|
| MS <sup>n</sup> Level       | 3        |
| MS Isolation Window (m/z)   | 1.8      |
| MS2 Isolation Window (m/z)  | 2        |
| Isolation Offset            | Off      |
| Activation Type             | CID      |
| CID Collision Energy (%)    | 30       |
| Detector Type               | Ion Trap |
| Ion Trap Scan Rate          | Rapid    |
| Maximum Injection Time (ms) | 35       |

**Figure SI-3.** Compound Discover Workflow

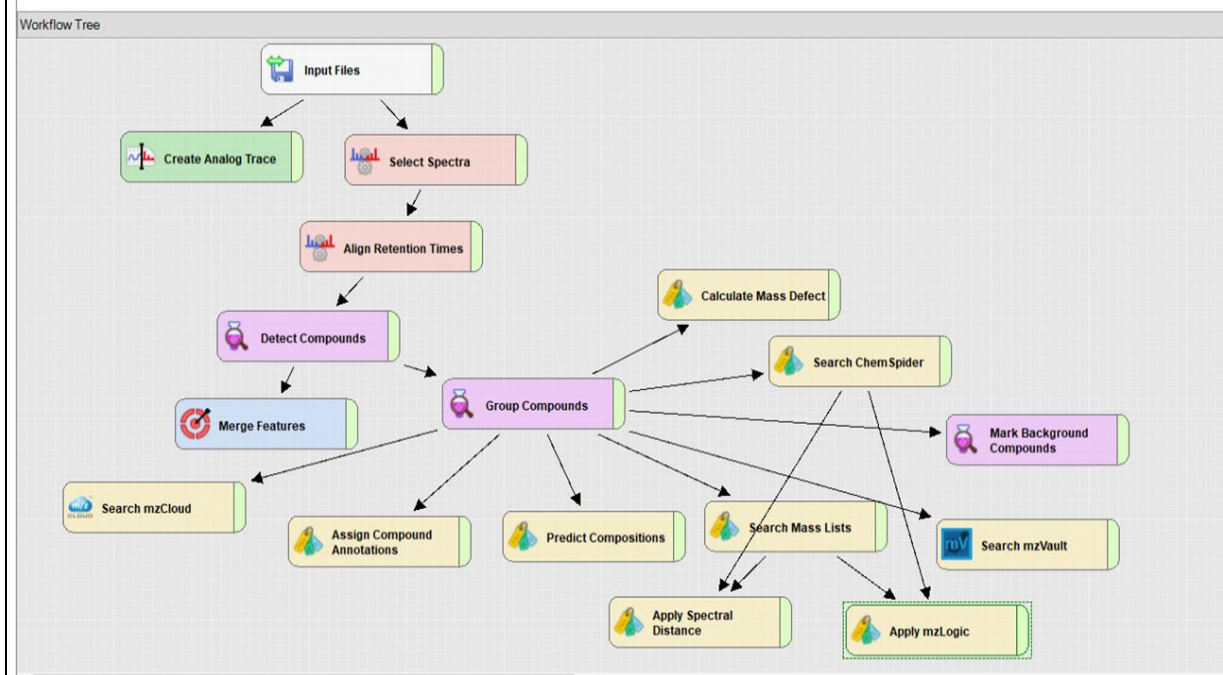



**Figure SI-4.** Log P and Retention Time (Rt) of the quality control compounds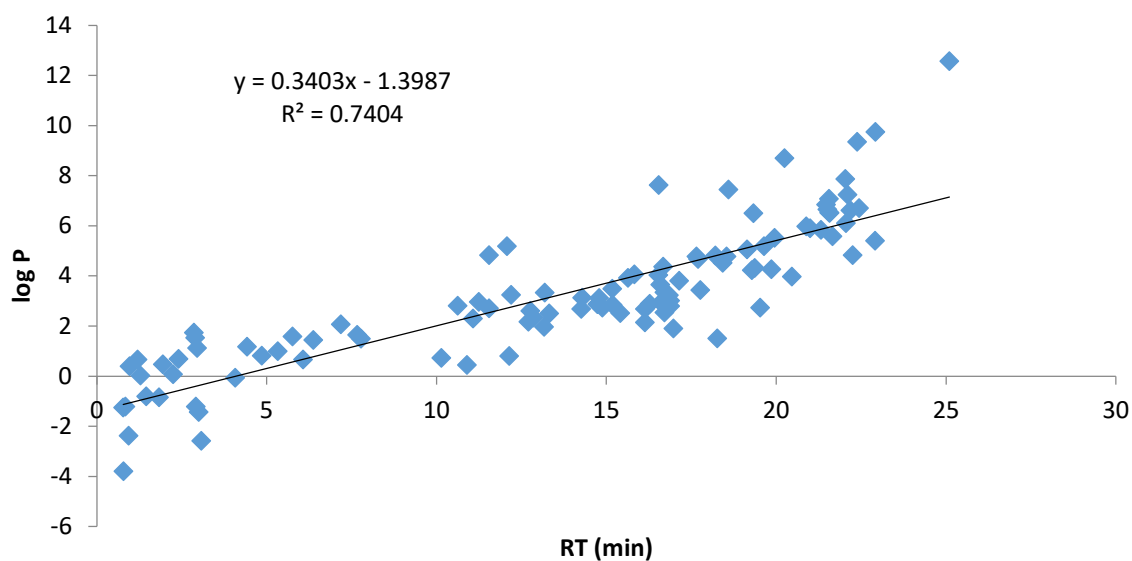

| Analyte                                    | Rt    | log P |
|--------------------------------------------|-------|-------|
| Sulfaguanidine                             | 0,85  | -1,22 |
| Val-Tyr-Val                                | 4,86  | 0,8   |
| Reserpine                                  | 13,19 | 3,32  |
| Caffeine                                   | 4,08  | -0,07 |
| Acetaminophen                              | 1,95  | 0,46  |
| Sulfadimethoxine                           | 7,67  | 1,63  |
| Terfenadine                                | 16,55 | 7,62  |
| 2,4-D                                      | 12,77 | 2,59  |
| 2-diethylamino-6-methyl pyrimidin-4-ol/one | 2,96  | 1,11  |
| 3,5,6-Trichloro-2-pyridinol                | 12,71 | 2,16  |
| 3-phenoxybenzoic acid                      | 15,64 | 3,91  |
| 4-Fluoro-3-phenoxybenzoic acid             | 15,83 | 4,05  |
| 4-nitrophenol                              | 5,77  | 1,57  |
| 5-hydroxy-thiabendazole                    | 2,86  | 1,73  |
| 6-Chloronicotinic acid                     | 5,33  | 0,98  |
| Acetochlor                                 | 16,61 | 2,92  |
| Acetochlor mercapturate                    | 14,75 | 2,86  |
| Alachlor mercapturate                      | 14,75 | 2,86  |
| Bentazone                                  | 10,63 | 2,8   |
| Benzophenone-3 (Oxybenzone)                | 16,59 | 3,64  |
| Carbendazim                                | 2,9   | 1,52  |
| Chlorfenvinphos                            | 18,43 | 4,51  |
| Chlormequat                                | 0,79  | -3,8  |
| Desisopropylatrazine                       | 4,43  | 1,16  |
| Diethylthiophosphate                       | 2,41  | 0,68  |
| Dimethyldithiophosphate                    | 1,2   | 0,65  |
| Fenhexamid                                 | 16,54 | 4,02  |
| Fenvalerate free acid                      | 16,72 | 3,33  |

|                                 |       |       |
|---------------------------------|-------|-------|
| Fipronil                        | 17,66 | 4,76  |
| Fipronil sulfone                | 18,6  | 7,44  |
| Fluopyram                       | 16,68 | 4,36  |
| Hydroxy-tebuconazole            | 15,42 | 2,5   |
| Isoproturon                     | 12,86 | 2,32  |
| Malathion dicarboxylic acid     | 7,78  | 1,48  |
| Mecoprop                        | 15,19 | 2,84  |
| Metolachlor                     | 16,89 | 3     |
| N,N-diethyl-m-toluamide ou DEET | 13,17 | 1,96  |
| Omethoate                       | 2,25  | 0,06  |
| Prochloraz                      | 17,15 | 3,8   |
| p-Toluenesulfonamide            | 12,15 | 0,79  |
| Triclosan glucuronide           | 16,72 | 2,53  |
| Triclosan sulfate               | 17,71 | 4,66  |
| acetamiprid-N-desmethyl         | 6,08  | 0,65  |
| Acephate                        | 1,84  | -0,85 |
| Avermectin B1a (Abamectin)      | 21,57 | 6,51  |
| Benodanil                       | 12,2  | 3,23  |
| benzoic acid                    | 16,98 | 1,89  |
| Bromoxynil                      | 11,25 | 2,95  |
| Butocarboxim                    | 18,27 | 1,49  |
| Cefoperazone                    | 6,38  | 1,43  |
| Dichlorvos                      | 10,15 | 0,71  |
| Dinoterb                        | 17,77 | 3,42  |
| Flamprop                        | 15,18 | 3,47  |
| Inabenfide                      | 14,27 | 2,67  |
| Ivermectin B1a                  | 22,19 | 6,61  |
| MCPA                            | 13,32 | 2,49  |
| Methamidophos                   | 1,46  | -0,82 |
| Nigericin                       | 22,26 | 4,82  |
| Phenytoin                       | 11,08 | 2,29  |
| Rifaximin                       | 16,85 | 3,22  |
| Salicylic acid                  | 7,19  | 2,06  |
| salinomycin                     | 22,06 | 6,1   |
| Simazine 2-Hydroxy              | 2,92  | -1,22 |
| Spinosad A (Spinosyn A)         | 18,21 | 4,8   |
| TCMTB                           | 14,29 | 3,12  |
| Tepraloxydim                    | 16,28 | 2,88  |
| Trichlorfon (Dylox)             | 10,9  | 0,43  |
| triclosan                       | 19,65 | 5,17  |
| Valproic acid                   | 14,89 | 2,72  |
| Vancomycin                      | 3     | -1,44 |
| 1-Stearyl glycerol              | 22,11 | 7,23  |
| 4-tert-Butylcyclohexyl acetate  | 20,47 | 3,96  |
| Bis(2-ethylhexyl)adipate        | 22,04 | 7,85  |

|                                         |        |       |
|-----------------------------------------|--------|-------|
| Citroflex A-4                           | 19,34  | 6,49  |
| Dibutyl phthalate                       | 11,55  | 4,82  |
| Dibutyl sebacate                        | 20,89  | 5,97  |
| Diethyl phthalate                       | 11,55  | 2,7   |
| Dimethyl sebacate                       | 16,89  | 2,79  |
| Dipentyl phthalate                      | 21     | 5,89  |
| Erucamide                               | 22,93  | 9,74  |
| Ethyl Oleate                            | 20,25  | 8,69  |
| Galaxolidone                            | 19,96  | 5,5   |
| Hexadecanamide                          | 21,48  | 6,84  |
| Hexadecanedioic acid                    | 19,15  | 5,05  |
| L-Histidine                             | 0,78   | -1,26 |
| Monobutyl phthalate                     | 19,53  | 2,72  |
| N,N'-Dicyclohexylurea                   | 14,79  | 3,1   |
| Octyl decyl phthalate                   | 22,39  | 9,336 |
| Oleamide                                | 21,56  | 7,07  |
| Palmitoleic acid                        | 21,51  | 6,64  |
| Palmitoyl ethanolamide                  | 21,32  | 5,82  |
| PEG n5                                  | 3,08   | -2,59 |
| Pyrene                                  | 12,08  | 5,17  |
| L-Pyroglutamic acid                     | 0,94   | -2,39 |
| Tributyl phosphate                      | 19,86  | 4,26  |
| Triethyleneglycol bis(2-ethylhexanoate) | 21,66  | 5,57  |
| L-Tyrosine                              | 0,97   | 0,38  |
| Urocanic acid                           | 1,29   | 0,01  |
| Dibutyl hexanodioate                    | 19,291 | 4,22  |
| Benzyl octyl adipate                    | 21,58  | 6,5   |
| D,L-Camphor                             | 16,139 | 2,13  |
| Irgafos 168                             | 25,103 | 12,56 |
| Benazol P                               | 19,378 | 4,3   |
| 3,5-ditert-butyl-4-hydroxybenzaldehyde  | 18,544 | 4,77  |
| Methyl dihydrojasmonate                 | 16,142 | 2,67  |
| Stearamide                              | 22,447 | 6,7   |
| Dodecyl sulfate                         | 22,916 | 5,39  |

**Table SI-1.** Description of the different nodes of the CD workflow

| NODE                          |                                                                                                                                                                                                                                                                                                                                                                                                                                                                                                                                                                                                                                                                                                                                                                                                                                                                                                                                                                                                                                                                                                                                                                                                                                                                                                                                                                                                                                                                                                                                                                                                                                                                                                                                                                                                                                         |  |
|-------------------------------|-----------------------------------------------------------------------------------------------------------------------------------------------------------------------------------------------------------------------------------------------------------------------------------------------------------------------------------------------------------------------------------------------------------------------------------------------------------------------------------------------------------------------------------------------------------------------------------------------------------------------------------------------------------------------------------------------------------------------------------------------------------------------------------------------------------------------------------------------------------------------------------------------------------------------------------------------------------------------------------------------------------------------------------------------------------------------------------------------------------------------------------------------------------------------------------------------------------------------------------------------------------------------------------------------------------------------------------------------------------------------------------------------------------------------------------------------------------------------------------------------------------------------------------------------------------------------------------------------------------------------------------------------------------------------------------------------------------------------------------------------------------------------------------------------------------------------------------------|--|
| <p>CREATE<br/>AMONG TRACE</p> | <p>Parameters of 'Create Analog Trace'</p> <p>Show Advanced Parameters</p> <ul style="list-style-type: none"> <li> <b>1. General Settings</b> <ul style="list-style-type: none"> <li>Trace Type UV</li> <li>RT Offset [min] 0</li> <li>Custom Label UV trace</li> </ul> </li> <li> <b>2. PDA Settings</b> <ul style="list-style-type: none"> <li>Total Scan False</li> <li>Spectrum Maxir False</li> <li>Wavelength Rar True</li> <li>Min. Wavelengt 190</li> <li>Max. Wavelengt 800</li> </ul> </li> </ul>                                                                                                                                                                                                                                                                                                                                                                                                                                                                                                                                                                                                                                                                                                                                                                                                                                                                                                                                                                                                                                                                                                                                                                                                                                                                                                                             |  |
| <p>SELECT<br/>SPECTRA</p>     | <p>Parameters of 'Select Spectra'</p> <p>Show Advanced Parameters</p> <ul style="list-style-type: none"> <li> <b>1. General Settings</b> <ul style="list-style-type: none"> <li>Precursor Selection Use MS(n - 1) Precursor</li> <li>Provide Profile Spectra Automatic</li> </ul> </li> <li> <b>2. Spectrum Properties Filter</b> <ul style="list-style-type: none"> <li>Lower RT Limit 0</li> <li>Upper RT Limit 0</li> <li>First Scan 0</li> <li>Last Scan 0</li> <li>Ignore Specified Scans</li> <li>Lowest Charge State 0</li> <li>Highest Charge State 0</li> <li>Min. Precursor Mass 100 Da</li> <li>Max. Precursor Mass 5000 Da</li> <li>Total Intensity Threshold 0</li> <li>Minimum Peak Count 1</li> </ul> </li> <li> <b>3. Scan Event Filters</b> <ul style="list-style-type: none"> <li>Mass Analyzer (Not specified)</li> <li>MS Order Any</li> <li>Activation Type (Not specified)</li> <li>Min. Collision Energy 0</li> <li>Max. Collision Energy 1000</li> <li>Scan Type Any</li> <li>Polarity Mode (Not specified)</li> </ul> </li> <li> <b>4. Peak Filters</b> <ul style="list-style-type: none"> <li>S/N Threshold (FT-only) 1.5</li> </ul> </li> <li> <b>5. Replacements for Unrecognized Properties</b> <ul style="list-style-type: none"> <li>Unrecognized Charge Replace 1</li> <li>Unrecognized Mass Analyzer ITMS</li> </ul> </li> </ul> <p><b>Precursor Selection</b><br/>           Specifies which precursor to use for higher order MSn spectra:<br/>           - 'Use MS1 Precursor': Uses the precursor of the associated MS1 scan,<br/>           - 'Use MS(n - 1) Precursor': Uses the precursor of the direct parent scan of the spectrum,<br/>           - 'Use MS(n - 1) with Parent Precursors': Uses the precursor of the direct parent scan and all preceding precursors up to the MS1 scan.</p> |  |

## ALIGN RETENTION TIME

| Parameters of 'Align Retention Times' |                |
|---------------------------------------|----------------|
| Show Advanced Parameters              |                |
| ▼ <b>1. General Settings</b>          |                |
| Alignment Model                       | Adaptive curve |
| Maximum Shift [min]                   | 2              |
| Mass Tolerance                        | 5 ppm          |

### Alignment Model

This defines the Model, which is used for the alignment. The adaptive curve calculates a flexible curve for retention time shift for each retention time point. The linear model uses one linear function through the complete retention time range.

## GROUP COMPOUNDS

| Parameters of 'Group Compounds'     |                                                                                    |
|-------------------------------------|------------------------------------------------------------------------------------|
| Show Advanced Parameters            |                                                                                    |
| ▼ <b>1. Compound Consolidation</b>  |                                                                                    |
| Mass Tolerance                      | 5 ppm                                                                              |
| RT Tolerance [min]                  | 0.1                                                                                |
| ▼ <b>2. Fragment Data Selection</b> |                                                                                    |
| Preferred Ions                      | [M+H] <sup>+</sup> +1; [M+NH <sub>4</sub> ] <sup>+</sup> +1; [M-H] <sup>-</sup> -1 |

### Mass Tolerance

This parameter specifies the mass tolerance to be used for grouping.

Minimum value = 0.1 ppm

Maximum value = 20 ppm

## DETECT COMPOUND

Parameters of 'Detect Compounds'

Show Advanced Parameters

1. General Settings

|                         |                                                                                                         |
|-------------------------|---------------------------------------------------------------------------------------------------------|
| Mass Tolerance (ppm)    | 5 ppm                                                                                                   |
| Intensity Tolerance (%) | 30                                                                                                      |
| S/N Threshold           | 3                                                                                                       |
| Min. Peak Intensity     | 100000                                                                                                  |
| Ions                    | -Na)+2; [M+H-NH4)+2; [M+H-H2O)+1; [M+H-NH3)+1; [M+K)+1; [M+Na)+1; [M+NH4)+1; [M-2H]-2; [M-2H+K)-1; [M-H |
| Min. Element Counts     | C H                                                                                                     |
| Max. Element Counts     | C90 H190 Br3 Cl4 K2 N10 Na2 O18 P3 S5                                                                   |

**Ions**  
This parameter allows selection of multiple ion definitions to be considered.

## CALCULATE MASS DEFECT

Parameters of 'Calculate Mass Defect'

Show Advanced Parameters

1. Mass Defect

|                      |       |
|----------------------|-------|
| Fractional Mass      | False |
| Standard Mass Defect | False |
| Relative Mass Defect | False |
| Kendrick Mass Defect | True  |

2. Kendrick Formula

|           |          |
|-----------|----------|
| Formula 1 | C2 H4 O  |
| Formula 2 | C2 H3 Cl |
| Formula 3 | C2 H2 F2 |
| Formula 4 | C3 H6    |
| Formula 5 | C8 H8    |

**Fractional Mass**  
This parameter specifies whether fractional mass should be calculated.

## MERGE FEATURES

### Parameters of 'Merge Features'

Show Advanced Parameters

#### 1. Peak Consolidation

|                    |       |
|--------------------|-------|
| Mass Tolerance     | 5 ppm |
| RT Tolerance [min] | 0.2   |

#### Mass Tolerance

This parameter specifies the mass tolerance to be used for peak merging.

Minimum value = 0.1 ppm  
Maximum value = 20 ppm

# SEARCH CHEMSPIDER

Parameters of 'Search ChemSpider'

Show Advanced Parameters

▼ 1. Search Settings

|                                                     |                                                                            |
|-----------------------------------------------------|----------------------------------------------------------------------------|
| Database(s)                                         | Alfa Chemistry; EPA DSSTox; EPA Toxcast; NIST; PurePEG; Sigma-Aldrich; TCI |
| Search Mode                                         | By Formula or Mass                                                         |
| Mass Tolerance                                      | 5 ppm                                                                      |
| Max. # of results per compound                      | 10                                                                         |
| Max. # of Predicted Compositions to be searched per | 3                                                                          |

Database(s)  
The selected databases are searched.



## MARK BACKGROUND COMPOUNDS

### Parameters of 'Mark Background Compounds'

Show Advanced Parameters

#### 1. General Settings

|                   |      |
|-------------------|------|
| Max. Sample/Blank | 5    |
| Max. Blank/Sample | 0    |
| Hide Background   | True |

#### Max. Sample/Blank

This parameter specifies the maximum allowed ratio of the sample vs. blank to be considered as background. Set to 0 to skip this rule.

Minimum value = 0.0

Maximum value = (unchecked)

## SEARCH mzCLOUD

Parameters of 'Search mzCloud'

Show Advanced Parameters

- 1. General Settings**

|                  |                          |
|------------------|--------------------------|
| Compound Classes | All                      |
| Library          | Autoprocessed; Reference |
- 2. DDA Search**

|                            |                      |
|----------------------------|----------------------|
| Identity Search            | HighChem HighRes     |
| Match Activation Type      | True                 |
| Match Activation Energy    | Match with Tolerance |
| Activation Energy Toleranc | 20                   |
| Apply Intensity Threshold  | True                 |
| Similarity Search          | Similarity Forward   |
| Match Factor Threshold     | 60                   |
- 3. DIA Search**

|                            |      |
|----------------------------|------|
| Use DIA Scans for Search   | True |
| Max. Isolation Width [Da]  | 500  |
| Match Activation Type      | True |
| Match Activation Energy    | Any  |
| Activation Energy Toleranc | 100  |
| Apply Intensity Threshold  | True |
| Match Factor Threshold     | 20   |

---

**Compound Classes**  
The Compound Classes used for the search.

## ASSIGN COMPOUND ANNOTATIONS

Parameters of 'Assign Compound Annotations'

Show Advanced Parameters

- 1. General Settings**

|                |       |
|----------------|-------|
| Mass Tolerance | 5 ppm |
|----------------|-------|
- 2. Data Sources**

|                |                        |
|----------------|------------------------|
| Data Source #1 | mzCloud Search         |
| Data Source #2 | mzVault Search         |
| Data Source #3 | MassList Search        |
| Data Source #4 | Predicted Compositions |
| Data Source #5 | ChemSpider Search      |
| Data Source #6 |                        |
| Data Source #7 |                        |
- 3. Scoring Rules**

|                       |      |
|-----------------------|------|
| Use mzLogic           | True |
| Use Spectral Distance | True |
| SFit Threshold        | 20   |
| SFit Range            | 20   |

---

**Mass Tolerance**  
This parameter specifies the mass tolerance to be used to validate annotations.  
Minimum value = 0.1 ppm  
Maximum value = 20 ppm

## PREDICT COMPOSITION

### Parameters of 'Predict Compositions'

Show Advanced Parameters

#### 1. Prediction Settings

|                     |                                  |
|---------------------|----------------------------------|
| Mass Tolerance      | 5 ppm                            |
| Min. Element Counts | C H                              |
| Max. Element Counts | C200 H800 Br5 Cl4 F5 N5 O80 Si15 |
| Min. RDBE           | 0                                |
| Max. RDBE           | 40                               |
| Min. H/C            | 0.1                              |
| Max. H/C            | 3.5                              |
| Max. # Candidates   | 10                               |

#### 2. Pattern Matching

|                           |      |
|---------------------------|------|
| Intensity Tolerance [%]   | 30   |
| Intensity Threshold [%]   | 0.1  |
| S/N Threshold             | 3    |
| Use Dynamic Recalibration | True |

#### 3. Fragments Matching

|                        |       |
|------------------------|-------|
| Use Fragments Matching | True  |
| Mass Tolerance         | 5 ppm |
| S/N Threshold          | 3     |

#### Mass Tolerance

This parameter specifies the mass tolerance to be used for prediction.

Minimum value = 0.1 ppm

Maximum value = 20 ppm

# SEARCH MASS LIST

Parameters of 'Search Mass Lists'

Show Advanced Parameters

▼ 1. Search Settings

|                    |                                                               |
|--------------------|---------------------------------------------------------------|
| Mass Lists         | \\Extractables and Leachables HRAM Compound Database.massList |
| Use Retention Time | True                                                          |
| RT Tolerance [min] | 0.1                                                           |
| Mass Tolerance     | 5 ppm                                                         |

**Mass Lists**  
This parameter allows the selection of several registered mass list files:  
The .masslist files can be edited using the file manager.

## SEARCH mz VAULT

### Parameters of 'Search mzVault'

Show Advanced Parameters

#### ▼ 1. Search Settings

|                                 |                                                                   |
|---------------------------------|-------------------------------------------------------------------|
| mzVault Library                 | \\mzVault Reference May 2019.db\mzVault Autoprocessed May 2019.db |
| Compound Classes                | All                                                               |
| Match Ion Activation Type       | True                                                              |
| Match Ion Activation Energy     | Match with Tolerance                                              |
| Ion Activation Energy Tolerance | 20                                                                |
| Match Ionization Method         | True                                                              |
| Apply Intensity Threshold       | True                                                              |
| Precursor Mass Tolerance        | 10 ppm                                                            |
| Match Analyzer Type             | True                                                              |
| Search Algorithm                | HighChem HighRes                                                  |
| Match Factor Threshold          | 50                                                                |
| RT Tolerance [min]              | 2                                                                 |
| Use Retention Time              | False                                                             |

#### mzVault Library

This parameter allows the selection of registered mzVault database files.

**APPLY  
SPECTRAL  
DISTANCE**

Parameters of 'Apply Spectral Distance'

Show Advanced Parameters

▼ **1. Pattern Matching**

|                           |       |
|---------------------------|-------|
| Mass Tolerance            | 5 ppm |
| Intensity Tolerance [%]   | 30    |
| Intensity Threshold [%]   | 0.1   |
| S/N Threshold             | 3     |
| Use Dynamic Recalibration | True  |

**Mass Tolerance**  
This parameter specifies the mass tolerance to be used for isotope search.  
Minimum value = 0.1 ppm  
Maximum value = 20 ppm

**APPLY  
mzLOGIC**

Parameters of 'Apply mzLogic'

Show Advanced Parameters

▼ **1. Search Settings**

|                                                   |    |
|---------------------------------------------------|----|
| Max. # Compounds                                  | 0  |
| Max. # mzCloud Similarity Results to consider per | 10 |
| Match Factor Threshold                            | 30 |

**Max. # Compounds**  
The maximum number of compounds for which candidates should be scored.  
0 means all candidates of all compounds are scored.  
Minimum value = 0  
Maximum value = (unchecked)

| <b>Table SI-2.</b> Calculation of the average response factor |             |                                               |                            |
|---------------------------------------------------------------|-------------|-----------------------------------------------|----------------------------|
| <b>Analytes</b>                                               | <b>Area</b> | <b>Concentration<br/>(ng·mL<sup>-1</sup>)</b> | <b>Response<br/>factor</b> |
| Sulfaguanidine                                                | 826910      | 10                                            | 82691                      |
| Val-Try-Val                                                   | 3709775     | 10                                            | 370978                     |
| Reserpine                                                     | 3548764     | 10                                            | 354876                     |
| Caffeine                                                      | 2631124     | 10                                            | 263112                     |
| Acetaminophen                                                 | 4351886     | 10                                            | 435189                     |
| Sulfadimethoxine                                              | 5639812     | 10                                            | 563981                     |
| Terfenadine                                                   | 19167123    | 10                                            | 1916712                    |
| <b>AVERAGE</b>                                                |             |                                               | <b>569648</b>              |

| <b>Table SI-3. Experimental MS<sup>3</sup> transitions</b>                                                    |                                                                                                        |
|---------------------------------------------------------------------------------------------------------------|--------------------------------------------------------------------------------------------------------|
| Substance                                                                                                     | <sup>1</sup> Acquired MS <sup>3</sup><br>(m/z MS <sup>2</sup> precursor > m/zMS <sup>3</sup> fragment) |
| 3,5-ditert-butyl-4-hydroxybenzaldehyde                                                                        | 179.1063 > 123.05                                                                                      |
| 4-tert-butylcyclohexyl acetate                                                                                | 135.1166 > 107.08                                                                                      |
| Benazol P                                                                                                     | 183.0679 > 155.06                                                                                      |
| Benzyl octyl adipate                                                                                          | 129.0544 > 100.93                                                                                      |
| Bis(2-ethylhexyl)adipate                                                                                      | 129.0545 > 111.06                                                                                      |
| Citroflex A-4                                                                                                 | 129.0180 > 111.00                                                                                      |
| D,L-Camphor                                                                                                   | -                                                                                                      |
| DEET                                                                                                          | 173.449 > 131.02                                                                                       |
| Dibutyl hexanodioate                                                                                          | 129.0536 > 111.08                                                                                      |
| Dibutyl phthalate                                                                                             | 149.0231 > 121.04                                                                                      |
| Dibutyl sebacate                                                                                              | 185.1172 > 139.03                                                                                      |
| Diethyl phthalate                                                                                             | 177.0546 > 149.05                                                                                      |
| Dipentyl phthalate                                                                                            | 149.0229 > 121.08                                                                                      |
| Dodecyl sulfate                                                                                               | 247.0226 > 219.03                                                                                      |
| Erucamide                                                                                                     | 321.3157 > 163.23                                                                                      |
| Galaxolidone                                                                                                  | 255.17455 > 227.24                                                                                     |
| Hexadecanamide                                                                                                | 130.1224 > 88.02                                                                                       |
| Irgafos 168                                                                                                   | 147.1167 > 132.09                                                                                      |
| Methyl dihydrojasmonate                                                                                       | 153.1271 > 97.06                                                                                       |
| N,N'-Dicyclohexylurea                                                                                         | 143.1181 > 60.92                                                                                       |
| Octyl decyl phthalate                                                                                         | 149.0231 > 121.04                                                                                      |
| Oleamide                                                                                                      | 135.1166 > 107.08                                                                                      |
| Palmitoyl ethanolamide                                                                                        | 283.2638 > 109.12                                                                                      |
| Stearamide                                                                                                    | 130.1222 > 88.02                                                                                       |
| <sup>1</sup> The fragmentation of the MS <sup>2</sup> precursor in the Linear Ion Trap was performed at 40 eV |                                                                                                        |
